# Supplementary material
Source: HighWire-hosted journal article supplement (https://jmg.bmj.com/content/55/10/693)
Supplement: inline-supplementary-material-1 [file inline-supplementary-material-1.docx]

**SUPPLEMENTAL FILE**

**Figures**

**Supplemental Figure 1: *IRS4* expression in brain and pituitary**. RT-PCR amplification of IRS4 in three individuals from the indicated tissues or brain nuclei. The expected product is 198 bp. Abbreviations: INF, infundibular nucleus; LH, lateral hypothalamus; PIT, pituitary; PVN, paraventricular nucleus; SON, supraoptic nucleus. No bands were seen when PCR was performed on samples in which the RT enzyme was omitted (not shown).

**
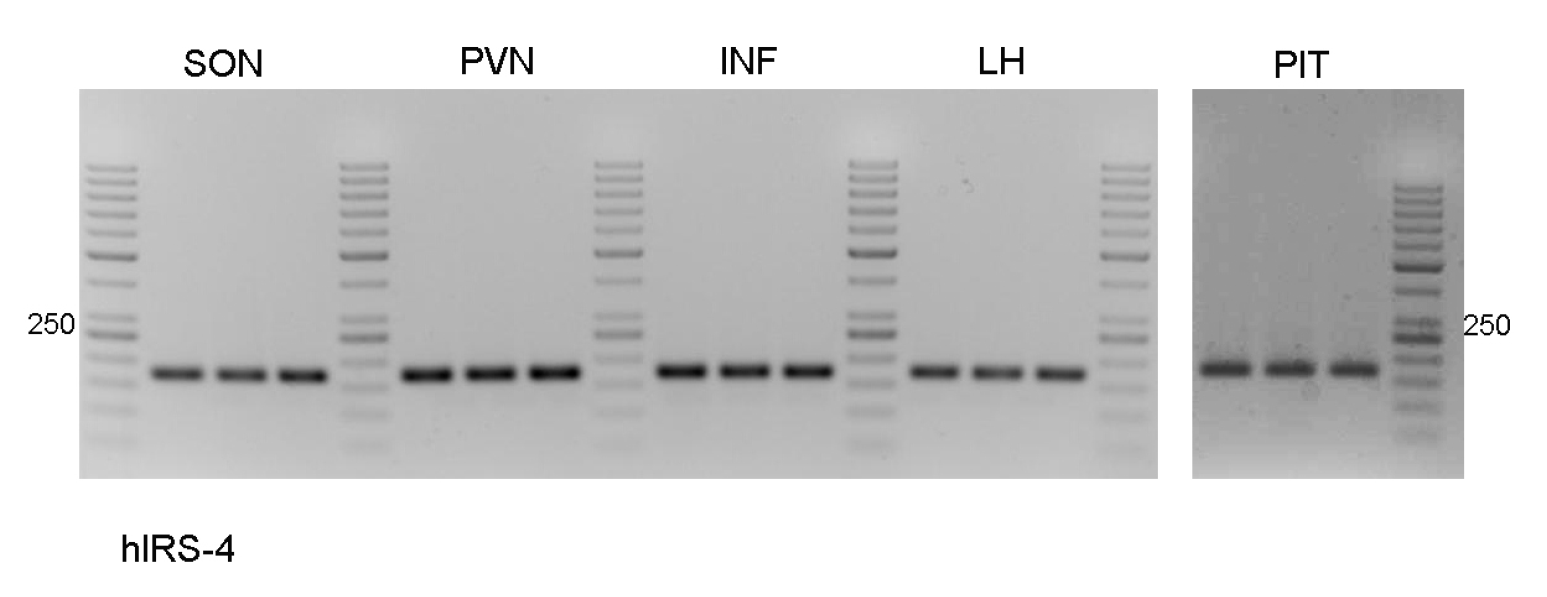
**

**Supplemental Figure 2: Characterization of the HPT-axis in male and female wild type and *Irs4* null mice**.
(A) *Trh* mRNA expression in the paraventricular nucleus of the hypothalamus, measured as the integrated density of the X-ray film signal,1 and (B) pituitary *Tshb* mRNA expression. (C) serum TSH, (D) T4, and (E) T3 concentrations. Black and white bars represent wild-type (WT) and knock out (KO) mice, respectively. Means with SEM are presented. P-values indicate the results of the two-way ANOVA. Post-hoc pair wise comparisons between groups are presented with the following symbols (a P<0.05, **P<0.01).

**
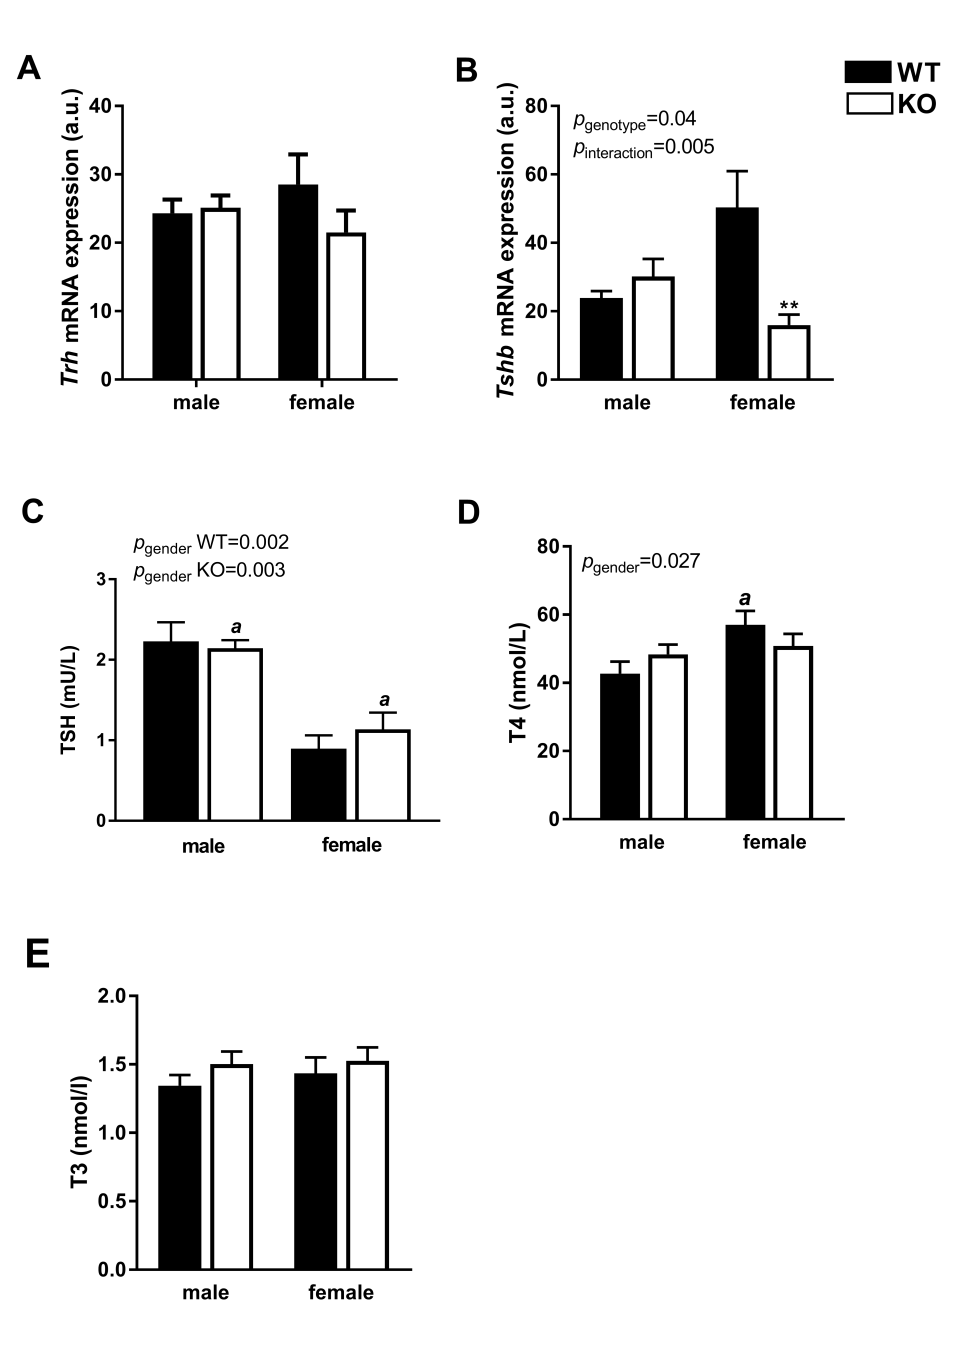
**

**Tables**

**Supplemental Table 1** **TRH stimulation testing of individuals with *IRS4* mutations.**

| **Case** | **M/F** | **Age at testing (years)** | **Baseline TSH (mU/L)** | **Peak TSH (mU/L)** | **Time peak TSH (minutes after TRH infusion)** | **Normalised TSH (mU/L)** | **Time normalised TSH (minutes after TRH infusion)** | **Baseline PRL (µg/L)** | **Peak PRL (µg/L)** |
| --- | --- | --- | --- | --- | --- | --- | --- | --- | --- |
| **A.II.6** | F | 50 | 3.0 | 22.5 | 20 min | 10.7 b | 120 min | 8.0 | 35.0 |
| **A.III.4** | M | 2 mos | 3.2 | 9.2* | 40 min | 4.4 | 180 min | 12.5 | 48.0 |
| **A.III.5** | M | 2 weeks | 4.6 | 10.9* | 30 min | 4.6 | 180 min | 72* | 125* |
| **B.II.2** | F | 53 | 1.5 | 11.0 | 20 min | 4.5 | 120 min | 4.5 | 49.0 |
| **B.III.2** | F | 26 | 3.6 | 21.9 | 20 min | 11.1b | 120 min | 11.5 | 88.0 |
| **B.III.3** | M | 11 | 3.4 | 3.9* | 45 min | 3.1 | 120 min | 4.3 | x |
| **B.III.4** | M | 1 mos | 4.5 | 8.3* | 30 min | 3.8 | 120 min | 9.1 | x |
| **C.I.2** | F | 53 | 3.5 | 22.9* | 20 min | 8.0b | 120 min | 4.5 | 53.0 |
| **C.II.2** | F | 31 | 1.3 | 9.3 | 20 min | 4.6 | 90 min | 9.5 | 36.0 |
| **C.III.2** | M | 2 mos | 8.3 | 16.8 | 30 min | 8.1 | 120 min | 23.5 | x |
| **D.II.4** | F | 37 | 2.2 | 18.0 | 20 min | 6.6 b | 120 min | 14.5 | 75.0 |
| **D.II.6** | F | 35 | 1.1 | 10.8 | 20 min | 4.7 | 120 min | 6.5 | 38.0 |
| **D.III.6** | M | 3 weeks | 3.5 | 5.2* | 30 min | 3.5 | 120 min | 34.2* | 61.0 |
| **E.II.4a** | F | 35 | 0.7 | 8.9 | 60 min* | 4.9 | 120 min | 38.0* | 205.0 |
| **E.III.4** | M | 2 weeks | 2.8 | 9.8* | 20 min | 3.4 | 180 min | x | x |

*: abnormal values; a, Lactating woman; b, lowest measured TSH concentration. Interpretation of TSH in adults: maximum response of TSH to TRH 2.8-22.5 mU/L,2 a peak TSH threefold the baseline TSH, and TSH after 20 min higher than after 60 min,3 in infants: maximum response of TSH to TRH >15 mU/L and return to baseline within 3 hours.4 Reference interval of baseline PRL in males: 0-19 µg/L, and in females: 0-25 µg/L (in-house reference interval). Minimum response of PRL to TRH >2.5-fold increase.5 Abbreviations: F, female; M, male; min, minutes; mos, months; PRL, prolactin; TSH, thyroid stimulating hormone; x, missing value.

| **Case** | **M/F** | **Age (yr)** | **LT4 treat-ment** | **Time of blood withdrawal** | **GH (mU/L)** | **IGF-1 (nmol/L)** | **IGF-1 (SDS)** | **IGFBP3**  **(mg/L)** | **Height (cm; SDS)** | **Weight (kg; SDS)** | **BMI** |
| --- | --- | --- | --- | --- | --- | --- | --- | --- | --- | --- | --- |
| **A.II.6** | F | 50 | - | 08:30 | 1.1  (<20) | 25 | +1.0 | 2.7  (1.0-4.0) | 171.3  (+0.1) | 52.7  (-1.6) | 18.0 kg/m2 |
| **A.III.4** | M | 19 | + | 08:30 | 0.7  (<10) | 35 | +0.7 | 2.3  (1.5-6.1) | 173  (-1.5) | 59.1  (-1.7) | 19.8 kg/m2 |
| **A.III.5** | M | 15 | + | 08:59 | 2.4  (<10) | 82 | +3.1 | 3.2  (1.5-6.1) | 182.3  (+0.6) | 62.9  (+0.1) | 18.9  kg/m2 |
| **B.II.2** | F | 53 | - | 09:40 | 1.8  (<20) | 28 | +1.6 | 2.3  (1.0-4.0) | 167.2  (-0.6) | 62.9  (-0.1) | 22.5  kg/m2 |
| **B.III.2** | F | 26 | - | 09:06 | 31.0*  (<20) | 32 | +1.1 | 1.7  (1.5-6.0) | 169.2  (-0.2) | 57.6  (-0.8) | 20.2  kg/m2 |
| **B.III.3** | M | 23 | + | 10:26 | 19.0*  (<10) | 45 | +2.8 | 2.5  (1.5-6.0) | 184.4  (+0.1) | 70.5  (-0.5) | 20.7  kg/m2 |
| **B.III.4** | M | 13 | + | 10:27 | 20.0*  (<10) | 62 | +1.5 | 2.6  (1.4-6.5) | 165.8  (+0.3) | 51.0  (+0.3) | +0.5  SDS |
| **C.I.2** | F | 53 | - | 10:12 | <0.2  (<20) | 12 | -1.2 | 3.5  (1.0-4.0) | 167.5  (-0.5) | 86.5*  (+2.0) | 30.8 kg/m2 |
| **C.II.2** | F | 31 | - | 10:19 | 1.4  (<20) | 37 | +2.3 | 2.7  (1.0-4.5) | 173.8  (+0.5) | 82.7  (+1.7) | 27.4  kg/m2 |
| **C.III.2** | M | 6 | + | 10:41 | 2.1  (<10) | 20 | +1.0 | 2.5  (1.2-4.0) | 117.5  (-0.5) | 22.7  (+0.1) | +1.0 SDS |
| **D.II.4** | F | 37 | - | 08:12 | 1.7  (<20) | 30 | +1.3 | 1.9  (1.0-4.5) | 173.5  (+0.4) | 66.7  (+0.3) | 22.2  kg/m2 |
| **D.II.6** | F | 35 | - | 08:48 | 0.6  (<20) | 27 | +0.8 | 2.2  (1.0-4.5) | 173.5  (+0.4) | 55.8  (-1.1) | 18.5  kg/m2 |
| **D.III.6** | M | 1 | + | 08:32 | 6.5  (<10) | 6.7 | +1.0 | 2.4  (1.0-3.2) | 79  (+0.5) | 10.2  (-0.2) | -0.8 SDS |
| **E.II.4a** | F | 35 | - | 10:37 | 0.8  (<20) | 19 | -0.6 | 2.2  (1.0-4.5) | 172.2  (+0.2) | 67.3  (+0.4) | 22.7  kg/m2 |
| **E.III.4** | M | 5 | + | 08:07 | 20*  (<10) | 15 | +0.6 | 1.7  (1.0-3.2) | 116.8  (-0.1) | 22.8  (+0.5) | +1.2 SDS |
| **E.III.5** | M | 3 | - | 09:02 | 14*  (<10) | 10 | +0.7 | 1.6  (1.0-3.2) | 102.9  (-0.3) | 18.5  (+0.7) | +1.5 SDS |
| **E.III.6** | F | 5 mos | - | 09:02 | 8.5  (<20) | 6.0 | x | 1.1  (0.6-3.6) | x | 6.4  (-1.3) | -1.3 SDS |

**Supplemental Table 2** **Growth hormone concentrations in individuals carrying *IRS4* mutations.**

*: abnormal values; a, Lactating woman. Abbreviations: cm, centimetres; F, female; GH, growth hormone; IGF-1, insulin-like growth factor-1; IGFBP3, insulin-like growth factor-binding protein 3; kg, kilograms; M, male; mos, months; SDS, standard deviation score; x, missing value; yr, years; +, yes; -, not applicable. Age specific reference intervals for IGFBP-3 and GH (in-house) between parentheses. IGF-1 SDS relative to age and gender.6 BMI expressed as kg/m2 in adults, and SDS in children. Height, weight and BMI SDS calculated with Dutch reference data.7

| **Case** | **M/F** | **Age (yr)** | **LT4 treat-ment** | **Time of blood with-drawal** | **Fasting glucose (mmol/L) RI <5.6** | **Leptin**  **(ng/mL)** | **T3/T4 ratiob (11.99-22.19)** | **rT3 (nmol/L)**  **RI: 0.11-0.44** | **Tg (pmol/L)**  **RI: <60** | **ACTH (ng/L)**  **RI: 0-55** | **Cortisol (nmol/L) RI: 100-650** | **PRL (µg/L)** | **LH (U/L)** | **FSH (U/L)** | **Test (nmol/L)** | **Estr (nmol/L)** | **SHBG (nmol/L)** |
| --- | --- | --- | --- | --- | --- | --- | --- | --- | --- | --- | --- | --- | --- | --- | --- | --- | --- |
| **A.II.6** | F | 50 | - | 08:30 | 5.2 | 3.0  (1.6-11.1) | 20.04 | 0.27 | 4 | 45 | 499 | 11.0  (0-25) | 43.0*  (2.0-26.2) | 60.68*  (2.2-17.0) | x | <0.02*  (0.1-1.1) | 107  (40-120) |
| **A.III.4** | M | 19 | + | 08:30 | 5.1 | 3.2  (0.8-4.3) | 30.07* | 0.08* | 3 | 53 | 323 | 12.0 (0-19) | 6.8  (1.95-9.4) | 3.04  (1.39-8.9) | 17.9  (11.6-33.8) | x | 29  (13.1-53.2) |
| **A.III.5** | M | 15 | + | 08:59 | 5.0 | 6.5  (0.6-24.7) | X | 0.23 | 10 | 22 | 218 | 6.0 (0-19) | 2.5  (<0.1-3.7) | 1.45  (<0.1-8.6) | 9.9  (1.1-25.4) | x | 30  (16-100) |
| **B.II.2** | F | 53 | - | 09:40 | 5.2 | 31.6*  (3.2-22.1) | 18.16 | 0.27 | 25 | <5 | 162 | 6.0 (0-25) | 46.1*  (2.0-26.2) | 138.80*  (2.2-17.0) | x | <0.02*  (0.1-1.1) | 25  (40-120) |
| **B.III.2** | F | 26 | - | 09.02 | 4.6 | 10.6  (2.2-14.9) | 16.27 | 0.36 | <1 | 10 | 192 | 11.5 (0-25) | 11.7  (2.0-26.2) | 3.84  (2.2-17.0) | x | 0.35  (0.1-1.1) | 61  (40-120) |
| **B.III.3** | M | 23 | + | 10:26 | 4.0 | 2.6  (0.9-5.2) | X | 0.06* | 16 | 10 | 164 | 5.5 (0-19) | 12.4*  (1.95-9.4) | 25.89*  (1.39-8.9) | 17.7  (11.6-33.8) | x | x |
| **B.III.4** | M | 13 | + | 10:27 | 5.4 | 2.9  (0.9-34.7) | X | 0.22 | 22 | 18 | 168 | 5.5 (0-19) | 3.1  (<0.1-3.7) | 10.59*  (<0.1-8.6) | 8.6  (0.1-21.5) | x | x |
| **C.I.2** | F | 53 | - | 10:12 | 5.5 | 52.7*  (7.5-51.2) | 22.49* | 0.26 | 14 | 13 | 255 | 5.5 (0-25) | 39.5*  (2.0-26.2) | 55.70*  (2.2-17.0) | x | 0.03*  (0.1-1.1) | 32  (40-120) |
| **C.II.2** | F | 31 | - | 10:19 | 5.4 | 29.7  (5.1-34.7) | 18.43 | 0.25 | 11 | 10 | 204 | 7.5 (0-25) | 5.7  (2.0-26.2) | 5.08  (2.2-17.0) | x | 0.15  (0.1-1.1) | 20  (40-120) |
| **C.III.2** | M | 6 | + | 10.41 | 4.5 | 3.9  (0.4-11.0) | 33.52* | 0.28 | 2 | 20 | 255 | 12.5 (0-19) | <1.0  (<0.1-4.0) | <1.00  (<0.1-7.1) | <0.1  (<0.5) | x | x |
| **D.II.4** | F | 37 | - | 08:12 | 5.2 | 12.7  (2.8-19.5) | 18.73 | 0.24 | 23 | 18 | 361 | 18.5 (0-25) | 5.0  (2.0-26.2) | 3.01  (2.2-17.0) | x | 0.43  (0.1-1.1) | 82  (40-120) |
| **D.II.6** | F | 35 | - | 08:48 | 5.1 | 7.8  (1.6-11.1) | 16.76 | 0.28 | 12 | 14 | 248 | 7.5 (0-25) | 6.4  (2.0-26.2) | 6.5  (2.2-17.0) | x | 0.28  (0.1-1.1) | x |
| **D.III.6** | M | 1 | + | 08:32 | 4.7 | 6.4  (0.3-4.1) | X | 0.43 | 7.6 | 135* | 420 | 728* (0-19) | 1.4  (<0.1-4.0) | 1.1  (<0.1-7.1) | <0.1  (<1.3) | x | x |
| **E.II.4a** | F | 35 | - | 10:37 | 4.7 | 14.0  (3.2-22.1) | 17.22 | 0.19 | 12 | 14 | 203 | 31.0* (0-25) | 1.4  (2.0-26.2) | 6.50  (2.2-17.0) | x | 0.08*  (0.1-1.1) | 56  (40-120) |
| **E.III.4** | M | 5 | + | 08:07 | 4.1 | X | 19.72 | 0.22 | 12 | 21 | 326 | 25.0* (0-19) | <1.0  (<0.1-4.0) | <1.00  (<0.1-7.1) | <0.1  (<0.7) | x | x |
| **E.III.5** | M | 3 | - | 09:02 | 4.0 | 2.9  (0.4-3.0) | 22.21* | 0.20 | 6 | 25 | 249 | 9.5 (0-19) | <1.0  (<0.1-4.0) | <1.00  (<0.1-7.1) | <0.1  (<0.5) | x | x |
| **E.III.6** | F | 5 mos | - | 09:02 | 5.4 | 7.2*  (0.8-2.4) | 23.04* | 0.51 | 48 | 86* | 103 | 21.0 (0-25) | <1.0  (<0.1-3.3) | 5.67  (<0.1-7.1) | x | 0.03  (<0.07-0.2) | 168  (60-252) |

**Supplemental Table 3** **Endocrine parameters in individuals carrying *IRS4* mutations.**

*: abnormal values; a, Lactating woman. b, units used in ratio calculation: T3, ng/dL; T4, ug/dL. Abbreviations: ACTH, adrenocorticotropic hormone; Estr, 17β-estradiol; F, female; FSH, follicle stimulating hormone; LH, luteinizing hormone; M, male; mos, months; PRL, prolactin; RI, reference interval; SHBG, sex hormone-binding globulin; T3, triiodothyronine; T4, thyroxin; TBG, thyroxine-binding globulin; Test, testosterone; Tg, thyroglobulin; rT3, reverse T3; x, missing value; yr, years; +, yes; -, not applicable. Reference intervals for leptin (age specific for children, BMI specific for adults),8-10 17β-estradiol, FSH, LH, SHBG, and testosterone (females and males, age specific) 11-14 , and T3/T4 ratio15 between parentheses.

**Supplemental Table 4** **Oral glucose tolerance tests in individuals with *IRS4* mutations.**

| **Case** | **M/F** | **Age** | **Baseline FPG (mmol/L)** | **Second FPG**  **(mmol/L)** | **PG after 2 hours**  **(mmol/L)** |
| --- | --- | --- | --- | --- | --- |
| **A.II.6** | F | 50 | 5.2 | 5.2 | 7.3 |
| **A.III.4** | M | 19 | 5.1 | 5.0 | 6.1 |
| **A.III.5** | M | 15 | 5.0 | 5.1 | 6.2 |
| **B.II.2** | F | 53 | 5.2 | 5.3 | 7.3 |
| **B.III.2** | F | 26 | 4.6 | 4.4 | 4.9 |
| **B.III.3** | M | 23 | 4.0 | 4.5 | 4.2 |
| **B.III.4** | M | 13 | 5.4 | 5.4 | 5.6 |
| **C.I.2** | F | 53 | 5.5 | 5.5 | 6.3 |
| **C.II.2** | F | 31 | 5.4 | 5.2 | 6.0 |
| **C.III.2** | M | 6 | 4.5 | x | 5.6 |
| **D.II.4** | F | 37 | 5.4 | 5.2 | 5.7 |
| **D.II.6** | F | 35 | 5.1 | 5.2 | 3.5 |
| **E.II.4 a** | F | 35 | 4.5 | 4.7 | 7.4 |

*: abnormal values; a, Lactating woman. Abbreviations: F, female; FPG, fasting plasma glucose; M, male; PG, plasma glucose; x, missing value. Reference interval for FPG ≤5.6 mmol/L, PG after two hours ≤7.8.16

**Supplemental Table 5** **HOMA in individuals with *IRS4* mutations.**

| **Case** | **M/F** | **Age (years)** | **FPI (pmol/L)** | **FPI (mU/L)** | **FPG (mmol/L)** | **HOMA-IR** |
| --- | --- | --- | --- | --- | --- | --- |
| **A.II.6** | F | 50 | 22 | 3.2 | 5.2 | 0.74 (1.85) |
| **A.III.4** | M | 19 | 62 | 8.9 | 5.1 | 2.02 (2.17) |
| **A.III.5** | M | 15 | 28 | 4.0 | 4.3 | 0.76 (3.16) |
| **B.II.2** | F | 53 | 105* | 15.1 | 4.9 | 3.29 (1.85) * |
| **B.III.2** | F | 26 | 58 | 8.4 | 4.4 | 1.64 (1.85) |
| **B.III.3** | M | 23 | 27 | 3.9 | 4.1 | 0.71 (2.17) |
| **B.III.4** | M | 13 | 37 | 5.3 | 4.5 | 1.06 (3.16) |
| **C.I.2** | F | 53 | 99* | 14.3 | 5.5 | 3.50 (1.85) * |
| **C.II.2** | F | 31 | 145* | 20.9 | 5.1 | 4.74 (1.85) * |
| **C.III.2** | M | 6 | 25 | 3.6 | 4.5 | 0.72 (3.16) |
| **D.II.4** | F | 37 | 16 | 2.3 | 5.9* | 0.60 (1.85) |
| **D.II.6** | F | 36 | <15 | <2.2 | 4.6 | 0.45 (1.85) |
| **D.III.6** | M | 2 | <15 | <2.2 | 4.7 | 0.46 (3.16) |
| **E.II.4a** | F | 35 | 40 | 5.8 | 4.8 | 1.24 (1.85) |
| **E.III.4** | M | 5 | <15 | <2.2 | 4.9 | 0.48 (3.16) |
| **E.III.5** | M | 3 | <15 | <2.2 | 4.8 | 0.47 (3.16) |
| **E.III.6** | F | 5 mos | <15 | <2.2 | 3.4 | 0.33 (3.16) |

*: abnormal values. Abbreviations: F, female; FPG, fasting plasma glucose; FPI, fasted plasma insulin; HOMA, homeostatic model assessment; IR, insulin resistance; M, male; mos, months; x, missing value. Reference interval for FPG ≥5.6 mmol/L, and FPI <62.5 pmol/L (American Diabetes Association). HOMA-IR is defined as FPG (mmol/L) x FPI (mU/L)/22.5. Cut-off values for HOMA-IR are presented in parentheses.17 18

**Supplemental Table 6.** **Lipid spectrum of individuals (male and female) with *IRS4* mutations.**

| **Case** | **M/F** | **Age (years)** | **TC (mmol/L)** | **HDL (mmol/L)** | **LDL (mmol/L)** | **TG (mmol/L)** |
| --- | --- | --- | --- | --- | --- | --- |
| **A.II.6** | F | 50 | 7.24* | 1.43 | 5.11* | 1.55 |
| **A.III.4** | M | 19 | 3.58 | 1.16 | 2.07 | 0.77 |
| **A.III.5** | M | 15 | 3.27 | 1.14 | 1.96 | 0.38 |
| **B.II.2** | F | 53 | 6.47* | 1.56 | 4.61* | 0.67 |
| **B.III.2** | F | 26 | 3.52 | 0.92* | 2.37 | 0.51 |
| **B.III.3** | M | 23 | 4.21 | 1.07 | 2.89 | 0.55 |
| **B.III.4** | M | 13 | 4.30 | 1.85 | 2.33 | 0.26* |
| **C.I.2** | F | 53 | 7.99* | 1.87 | 4.58* | 3.43* |
| **C.II.2** | F | 31 | 4.60 | 1.80 | 2.41 | 0.87 |
| **D.II.4** | F | 37 | 4.12 | 1.79 | 2.11 | 0.48 |
| **D.II.6** | F | 36 | 3.86 | 1.44 | 2.05 | 0.83 |
| **D.III.6** | M | 2 | 4.11 | 0.98* | 2.74 | 1.57 |
| **E.II.4a** | F | 35 | 4.81 | 1.49 | 3.16 | 0.36* |
| **E.III.4** | M | 5 | 3.63 | 1.60 | 1.94 | 0.20* |
| **E.III.5** | M | 3 | 4.37 | 1.27 | 2.93 | 0.37 |
| **E.III.6** | F | 5 mos a | 4.00 | 0.97* | 1.69 | 2.97* |

*: abnormal values; a Most likely non-fasting measurements. Abbreviations: F, female; HDL, high-density lipoprotein; LDL, low-density lipoprotein; M, male; mo, months; TC, total cholesterol; TG, triglyceride; x, missing value; y, years. Paediatric reference intervals for total cholesterol: 2.7-5.5 mmol/L, HDL: 1.0-2.3 mmol/L, LDL: 1.1-3.4 mmol/L, triglycerides: 0.34-1.95 mmol/L.19 Adult reference intervals for total cholesterol: 2.9-6.1 mmol/L, HDL: 1.0-2.7 mmol/L, LDL: 1.2-4.3 mmol/L, triglycerides: 0.45-2.60 mmol/L.19

**Supplemental Table 7:** **TSH secretion characteristics.**

|  | **TSH** | | |
| --- | --- | --- | --- |
|  | **Patients** | **Controls** | **P** |
| **Number** | 2 | 11 |  |
| **Age (years)** | 21.0 | 33.0 (30.0-37.0) | 0.005 |
| **BMI (kg/m2)** | 20.4 | 23.4 (21.6-27.2) | 0.112 |
| **Free T4 (pmol/L)** | 3.4 | 16.6 (14.6-19.3) | 0.000 |
| **Pulse frequency (number/24 hours)** | 20.5 | 18.0 (17.0-21.0) | 0.377 |
| **Fast half-life (min)** | 9.6 | 21.4 (12.9-26.9) | 0.140 |
| **Slow half-life (min)** | 108.0 | 84.0 (55.4-89.0) | 0.146 |
| **Mode day (min)** | 7.4 | 17.2 (14.2-30.0) | 0.083 |
| **Mode night (min)** | 23.2 | 9.6 (8.3-14.8) | 0.060 |
| **Basal secretion (mU/L/24 hours)** | 2.2 | 23.0 (9.3-34.6) | 0.030 |
| **Pulsatile secretion (mU/L/24 hours)** | 2.6 | 21.9 (14.3-30.8) | 0.032 |
| **Total secretion (mU/L/24 hours)** | 4.7 | 43.6 (33.5-62.1) | 0.015 |
| **Mean pulse mass (mU/L)** | 0.1 | 1.3 (0.9-1.8) | 0.095 |
| **Weibull lambda (number/24 hours)** | 18.5 | 16.6 (15.8-17.9) | 0.359 |
| **Weibull gamma** | 2.0 | 2.1 (1.8-2.4) | 0.642 |
| **Approximate entropy** | 0.9 | 0.9 (0.6-1.2) | 0.846 |

Data are presented as median, or median (interquartile range).

**REFERENCES**

1. Mayerl S, Visser TJ, Darras VM, Horn S, Heuer H. Impact of Oatp1c1 deficiency on thyroid hormone metabolism and action in the mouse brain. *Endocrinology* 2012;153(3):1528-37. doi: 10.1210/en.2011-1633

2. Wiersinga WM. The peripheral conversion of thyroxine (T4) into triiodothyronine (T3) and reverse triiodothyronine (rT3). University of Amsterdam, 1979.

3. Milner RD, Herber SM. Response to TRH in suspected hypopituitarism. *Arch Dis Child* 1983;58(3):195-7.

4. van Tijn DA, de Vijlder JJ, Vulsma T. Role of the thyrotropin-releasing hormone stimulation test in diagnosis of congenital central hypothyroidism in infants. *The Journal of clinical endocrinology and metabolism* 2008;93(2):410-9. doi: 10.1210/jc.2006-2656

5. Le Moli R, Endert E, Fliers E, Prummel MF, Wiersinga WM. Evaluation of endocrine tests. A: the TRH test in patients with hyperprolactinaemia. *The Netherlands journal of medicine* 2003;61(2):44-8.

6. Bidlingmaier M, Friedrich N, Emeny RT, Spranger J, Wolthers OD, Roswall J, Korner A, Obermayer-Pietsch B, Hubener C, Dahlgren J, Frystyk J, Pfeiffer AF, Doering A, Bielohuby M, Wallaschofski H, Arafat AM. Reference intervals for insulin-like growth factor-1 (igf-i) from birth to senescence: results from a multicenter study using a new automated chemiluminescence IGF-I immunoassay conforming to recent international recommendations. *The Journal of clinical endocrinology and metabolism* 2014;99(5):1712-21. doi: 10.1210/jc.2013-3059

7. Fredriks AM, van Buuren S, Wit JM, Verloove-Vanhorick SP. Body index measurements in 1996-7 compared with 1980. *Arch Dis Child* 2000;82(2):107-12.

8. Ruiter A, Ackermans M, Endert E, Adan R. Reference Values for Leptin in Human Plasma Related to the Body Mass Index. Unpublished manuscript.

9. Lausten-Thomsen U, Christiansen M, Louise Hedley P, Esmann Fonvig C, Stjernholm T, Pedersen O, Hansen T, Holm JC. Reference values for serum leptin in healthy non-obese children and adolescents. *Scandinavian journal of clinical and laboratory investigation* 2016;76(7):561-67. doi: 10.1080/00365513.2016.1210226

10. Wilasco MI, Goldani HA, Dornelles CT, Maurer RL, Kieling CO, Porowski M, Silveira TR. Ghrelin, leptin and insulin in healthy children: Relationship with anthropometry, gender, and age distribution. *Regul Pept* 2012;173(1-3):21-6. doi: 10.1016/j.regpep.2011.08.013

11. Bjerner J, Biernat D, Fossa SD, Bjoro T. Reference intervals for serum testosterone, SHBG, LH and FSH in males from the NORIP project. *Scandinavian journal of clinical and laboratory investigation* 2009;69(8):873-9 e1-11. doi: 10.3109/00365510903380886

12. Stricker R, Eberhart R, Chevailler MC, Quinn FA, Bischof P, Stricker R. Establishment of detailed reference values for luteinizing hormone, follicle stimulating hormone, estradiol, and progesterone during different phases of the menstrual cycle on the Abbott ARCHITECT analyzer. *Clinical chemistry and laboratory medicine : CCLM / FESCC* 2006;44(7):883-7. doi: 10.1515/CCLM.2006.160

13. Soldin OP, Hoffman EG, Waring MA, Soldin SJ. Pediatric reference intervals for FSH, LH, estradiol, T3, free T3, cortisol, and growth hormone on the DPC IMMULITE 1000. *Clinica chimica acta; international journal of clinical chemistry* 2005;355(1-2):205-10. doi: 10.1016/j.cccn.2005.01.006

14. Kushnir MM, Blamires T, Rockwood AL, Roberts WL, Yue B, Erdogan E, Bunker AM, Meikle AW. Liquid chromatography-tandem mass spectrometry assay for androstenedione, dehydroepiandrosterone, and testosterone with pediatric and adult reference intervals. *Clinical chemistry* 2010;56(7):1138-47. doi: 10.1373/clinchem.2010.143222

15. Mortoglou A, Candiloros H. The serum triiodothyronine to thyroxine (T3/T4) ratio in various thyroid disorders and after Levothyroxine replacement therapy. *Hormones (Athens)* 2004;3(2):120-6.

16. American Diabetes A. Standards of Medical Care in Diabetes-2016 Abridged for Primary Care Providers. *Clin Diabetes* 2016;34(1):3-21. doi: 10.2337/diaclin.34.1.3

17. Ghasemi A, Tohidi M, Derakhshan A, Hasheminia M, Azizi F, Hadaegh F. Cut-off points of homeostasis model assessment of insulin resistance, beta-cell function, and fasting serum insulin to identify future type 2 diabetes: Tehran Lipid and Glucose Study. *Acta Diabetol* 2015;52(5):905-15. doi: 10.1007/s00592-015-0730-3

18. Kurtoglu S, Hatipoglu N, Mazicioglu M, Kendirici M, Keskin M, Kondolot M. Insulin resistance in obese children and adolescents: HOMA-IR cut-off levels in the prepubertal and pubertal periods. *J Clin Res Pediatr Endocrinol* 2010;2(3):100-6. doi: 10.4274/jcrpe.v2i3.100

19. Hilsted L, Rustad P, Aksglaede L, Sorensen K, Juul A. Recommended Nordic paediatric reference intervals for 21 common biochemical properties. *Scandinavian journal of clinical and laboratory investigation* 2013;73(1):1-9. doi: 10.3109/00365513.2012.721519
